# Supplementary material for: Nitridation-driven construction of Ru/WNO catalysts enables highly selective cellulose to C 2 alcohols hydrogenolysis
Source: Royal Society of Chemistry journal article supplement (doi:10.1039/d5cc07174g), 2026-01-01
Supplement: d5cc07174g1.pdf [file d5cc07174g1.pdf]

**Supporting Information**

**Nitridation-Driven Construction of Ru/WNO Catalysts Enables Highly Selective Cellulose to C<sub>2</sub> Alcohols Hydrogenolysis**

Wei Jia<sup>a</sup>, Nianxue Zhai<sup>b</sup>, Hongxiao Wang<sup>b</sup>, DanDan Wang<sup>b</sup>, Yuandong Cui<sup>b</sup>, Guoqing Ren<sup>c,\*</sup>, Xiaoli Yang<sup>b,\*</sup>

<sup>a</sup> Pei County Secondary Specialized School of Jiangsu Province, Xuzhou 221600, China

<sup>b</sup> College of Textiles and Clothing, State Key Laboratory of BioFibers and Eco-textiles, Qingdao University, Qingdao 266071, China

<sup>c</sup> Institute of Frontier Chemistry, School of Chemistry and Chemical Engineering, Shandong University, Qingdao, Shandong, 266237, P. R. China

\* Corresponding author. Email: [renguoqing@sdu.edu.cn](mailto:renguoqing@sdu.edu.cn), [xlyang@qdu.edu.cn](mailto:xlyang@qdu.edu.cn)

**No of Pages: 14**

**Summary:**

### **Experimental Section**

**Fig. S1.** Recycling tests of Ru/WNO-800. Reaction conditions: 0.1 g of cellulose, 0.05 g of catalysis, 30 mL of deionized water, 245 °C, initial 5 MPa H<sub>2</sub>, 4 h. EG: ethylene glycol; EtOH: ethanol.

**Fig. S2.** XRD patterns of used Ru/WNO-800.

**Fig. S3.** SEM images of (a, b) Ru/WNO-400; (c, d) Ru/WNO-600; (e, f) Ru/WNO-800; (g, h) Ru/WNO-900.

**Fig. S4.** N<sub>2</sub> adsorption–desorption isotherm of Ru/WNO-*t* catalysts.

**Fig. S5.** TEM image, SAED pattern and elemental mapping images of Ru/WNO-400.

**Fig. S6.** TEM image, SAED pattern and elemental mapping images of Ru/WNO-600.

**Fig. S7.** TEM image, SAED pattern and elemental mapping images of Ru/WNO-900.

**Fig. S8.** Raman spectra of WNO-*t* catalysts.

**Fig. S9.** Ru 3p spectra of Ru/WNO-*t* catalysts.

**Fig. S10.** NH<sub>3</sub>-TPD profiles of Ru/WNO-*t* catalysts.

**Fig. S11.** Acidity content of Ru/WNO-*t* catalysts.

**Fig. S12.** The linear correlation between total acid amount and W-O bonds in Ru/WNO-*t* catalysts.

**Table S1.** Catalytic performance of Ru/WNO-*t*.

**Table S2.** Catalytic performance of previously reported catalysts.

**Table S3.** Catalytic performance of Ru/WNO-800 under different reaction conditions.

**Table S4.** The elemental content of Ru and W in the solution after reaction.

**Table S5.** Structural parameters of Ru/WNO-*t* catalysts.

**Table S6.** Relative acid amount of Ru/WNO-*t* catalysts obtained by NH<sub>3</sub>-TPD curves.

**Table S7.** Different acid types of Ru/WNO-*t* catalysts obtained by Py-IR spectra.

**Reference**

## Experimental Section

### Materials and catalyst preparation

Tungsten chloride ( $\text{WCl}_6$ ), absolute ethanol (99.7%), microcrystalline cellulose (25  $\mu\text{m}$ ), ethylene glycol (98%), glucose (99%), fructose (99%), sorbitol (98%), mannose (99%), propylene glycol (99%), and butylene glycol (98%) were purchased from Shanghai Aladdin Biochemical Technology Co., Ltd., and all chemicals were used without further processing. Ruthenium (III) chloride hydrate ( $\text{RuCl}_3 \cdot x\text{H}_2\text{O}$ , ReagentPlus<sup>®</sup>) was purchased from Merck KGaA, Darmstadt, Germany. Before use, it was dissolved in deionized water and diluted to a concentration of 10 g L<sup>-1</sup>.

$\text{WO}_x$  was synthesized by dissolving 1.6 g of  $\text{WCl}_6$  in 80 mL of ethanol and stirring for 30 min until a dark-blue solution was obtained. The mixture was then transferred to a PTFE-lined autoclave and heated at 160 °C for 12 h. The resulting solid was filtered, washed thoroughly with deionized water, and dried under vacuum to afford blue  $\text{WO}_x$ . Nitridation was performed in a tubular furnace under flowing  $\text{NH}_3$  at 400, 600, 800, or 900 °C (2 h, 5 °C min<sup>-1</sup>), yielding  $\text{WNO-}t$  ( $t$  = nitridation temperature).

$\text{Ru/WNO-}t$  catalysts were prepared by incipient wetness impregnation. Typically, 200 mg of  $\text{WNO-}t$  was dispersed in 50 mL of deionized water, followed by addition of an appropriate volume of  $\text{RuCl}_3$  solution to achieve 3 wt% Ru loading. After stirring for 2 h, the mixture was dried, ground, and reduced under  $\text{H}_2$  at 400 °C for 2 h. The reduced samples were passivated in 1%  $\text{O}_2/\text{N}_2$  for 2 h (5 °C min<sup>-1</sup>) to obtain the final catalysts.

### Catalytic activity measurements

Catalytic tests were conducted in a 100 mL stainless-steel autoclave. A mixture of catalyst (50 mg), microcrystalline cellulose (100 mg), and deionized water (30 mL) was loaded into the reactor. After sealing, the system was purged with  $\text{H}_2$  several times, then pressurized to 5 MPa with high-purity hydrogen (99.999%). The reaction was carried out at 245 °C for 4 h under magnetic stirring (600 rpm). Notably, at an initial pressure of 5 MPa, the pressure inside the vessel reaches 10.2 MPa when the reactor is heated to 245 °C. After cooling to room temperature, the liquid products were analyzed by HPLC (Agilent 1260) equipped with an 87-H column and a refractive index detector (RID). A 2 mmol L<sup>-1</sup>  $\text{H}_2\text{SO}_4$  aqueous solution was used as the mobile phase at 0.6 mL min<sup>-1</sup>. All catalytic tests were repeated three times, and the relative error for each sample was controlled within 3%. Carbon balance was calculated based on quantified liquid-phase products. Under the optimized conditions used for

catalyst comparison, the carbon balance exceeded 90%, whereas lower values were observed at incomplete conversion due to the formation of undetected oligomeric species.

### **Catalysis characterization**

X-ray diffraction (XRD) patterns were recorded on a Rigaku Ultima IV diffractometer using Cu K $\alpha$  radiation ( $\lambda = 0.15406$  nm) with a scanning rate of  $10^\circ \cdot \text{min}^{-1}$  over a  $2\theta$  range of  $10^\circ$ - $80^\circ$ . Scanning electron microscopy (SEM) images were acquired on a Sigma 500 microscope. Transmission electron microscopy (TEM) analysis was carried out using a Talos F200SG2 microscope to examine particle size and lattice structure.

Brunauer-Emmett-Teller (BET) specific surface area was measured using a TriStar 3000 analyzer after degassing samples at  $120^\circ\text{C}$  for 3 h. X-ray photoelectron spectroscopy (XPS) was conducted on a PHI 5000 VersaProbe II spectrometer, and binding energies were calibrated to the C 1s peak at 284.8 eV. Raman spectra were collected on a Thermo Fisher DXR2 micro-Raman spectrometer.

$\text{NH}_3$  temperature-programmed desorption ( $\text{NH}_3$ -TPD) measurements were performed on a MICROTRAC MRB BELCAT-II apparatus. Samples were first pretreated in Ar at  $250^\circ\text{C}$  ( $5^\circ\text{C min}^{-1}$ , 1 h), then reduced in 5 vol%  $\text{H}_2/\text{Ar}$  by heating to  $400^\circ\text{C}$  ( $5^\circ\text{C min}^{-1}$ , 30 min). After cooling to  $50^\circ\text{C}$  and purging with Ar, adsorption of 5 vol%  $\text{NH}_3/\text{Ar}$  was carried out until saturation. The samples were subsequently purged with Ar to remove weakly adsorbed species, followed by temperature-programmed desorption from  $50^\circ\text{C}$  to  $900^\circ\text{C}$  at  $10^\circ\text{C min}^{-1}$  under Ar flow.

Pyridine-adsorbed FTIR (Py-IR) spectra were acquired on a Nicolet 380 spectrometer. Samples were pretreated under vacuum at  $350^\circ\text{C}$  for 1 hour, cooled to  $40^\circ\text{C}$ , and exposed to pyridine vapor for 10 min. After physisorbed pyridine removal, spectra were collected at room temperature and after desorption at  $150^\circ\text{C}$  under dynamic vacuum.

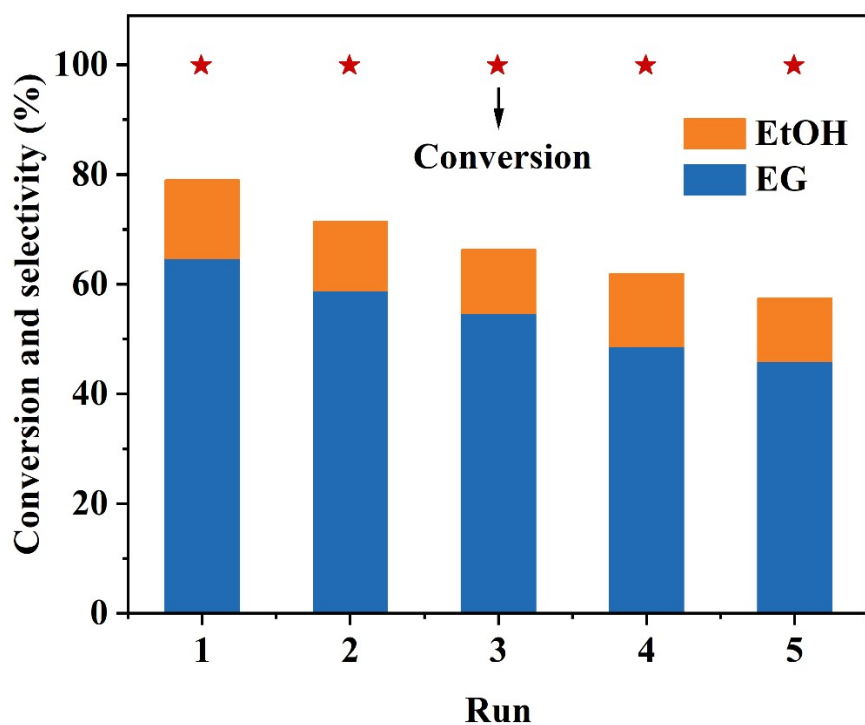

**Fig. S1.** Recycling tests of Ru/WNO-800. Reaction conditions: 0.1 g of cellulose, 0.05 g of catalysis, 30 mL of deionized water, 245 °C, initial 5 MPa H<sub>2</sub>, 4 h. EG: ethylene glycol; EtOH: ethanol.

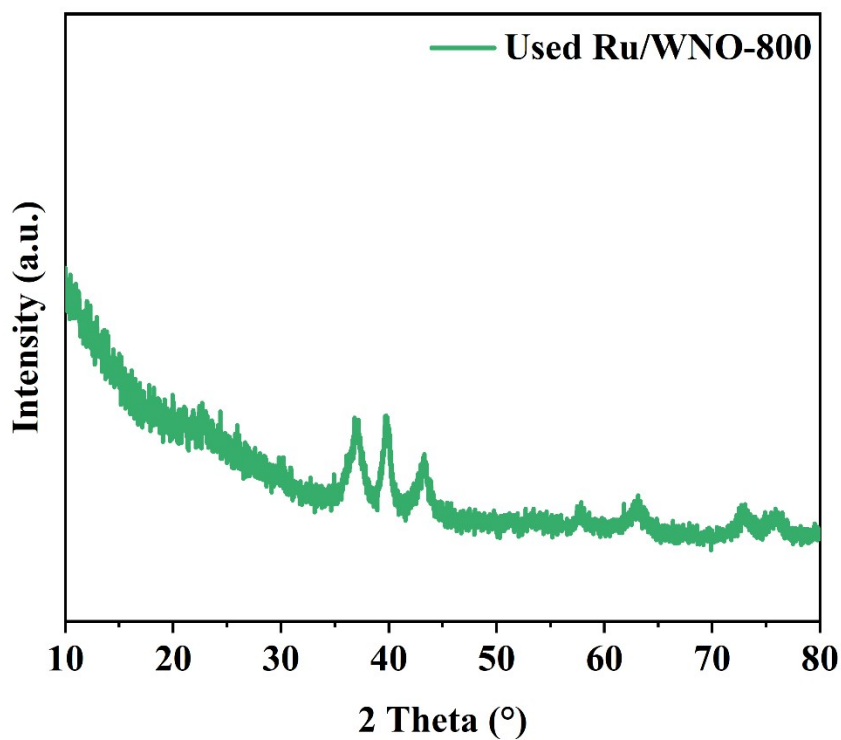

**Fig. S2.** XRD patterns of used Ru/WNO-800.

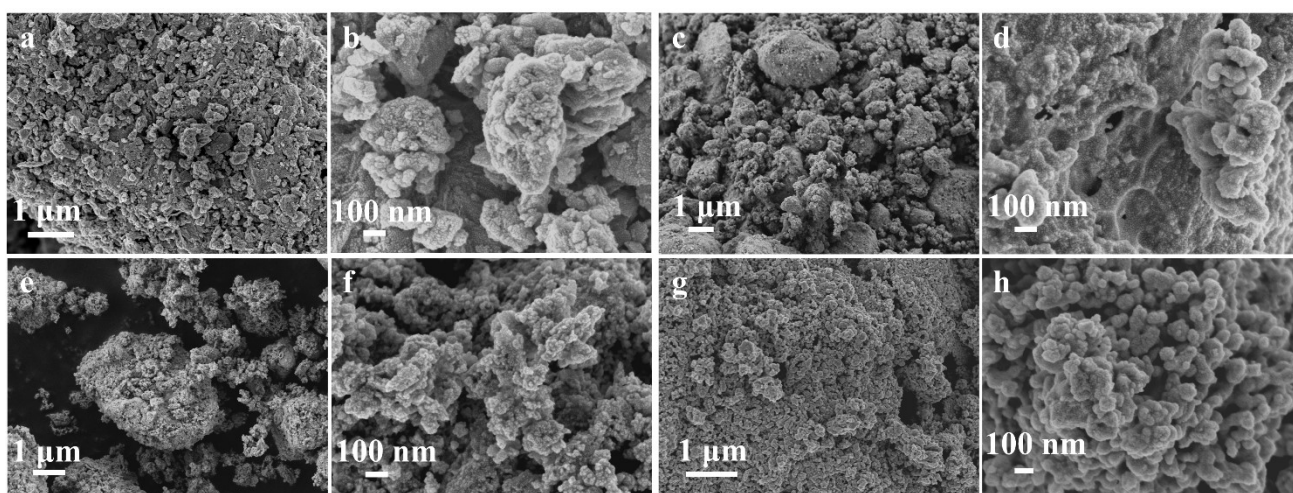

**Fig. S3.** SEM images of (a, b) Ru/WNO-400; (c, d) Ru/WNO-600; (e, f) Ru/WNO-800; (g, h) Ru/WNO-900.

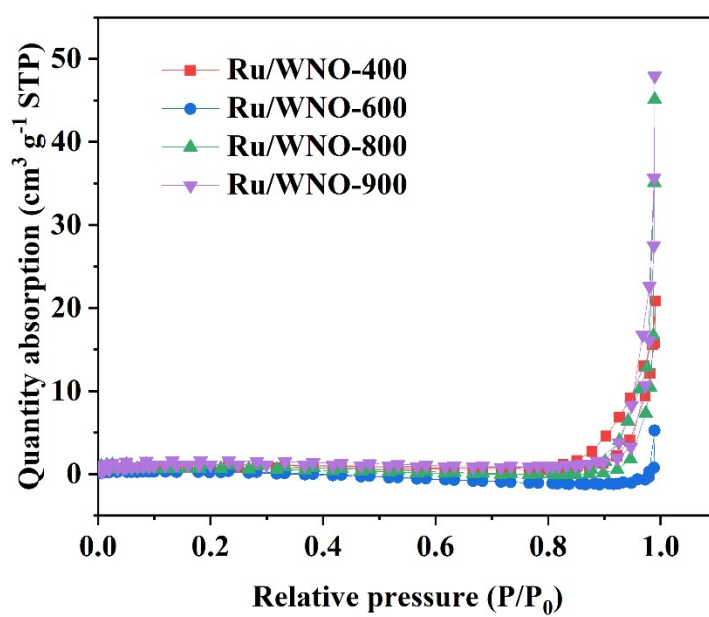

**Fig. S4.** N<sub>2</sub> adsorption–desorption isotherm of Ru/WNO-*t* catalysts.



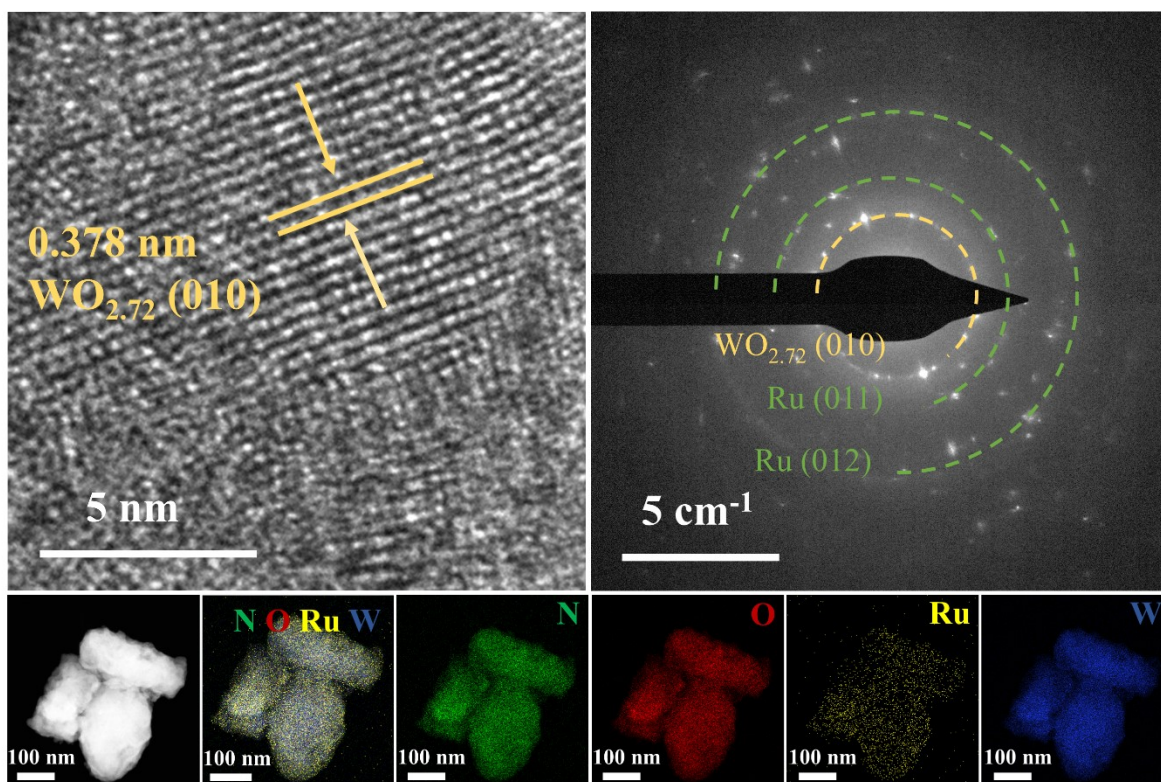

**Fig. S5.** TEM image, SAED pattern and elemental mapping images of Ru/WNO-400.

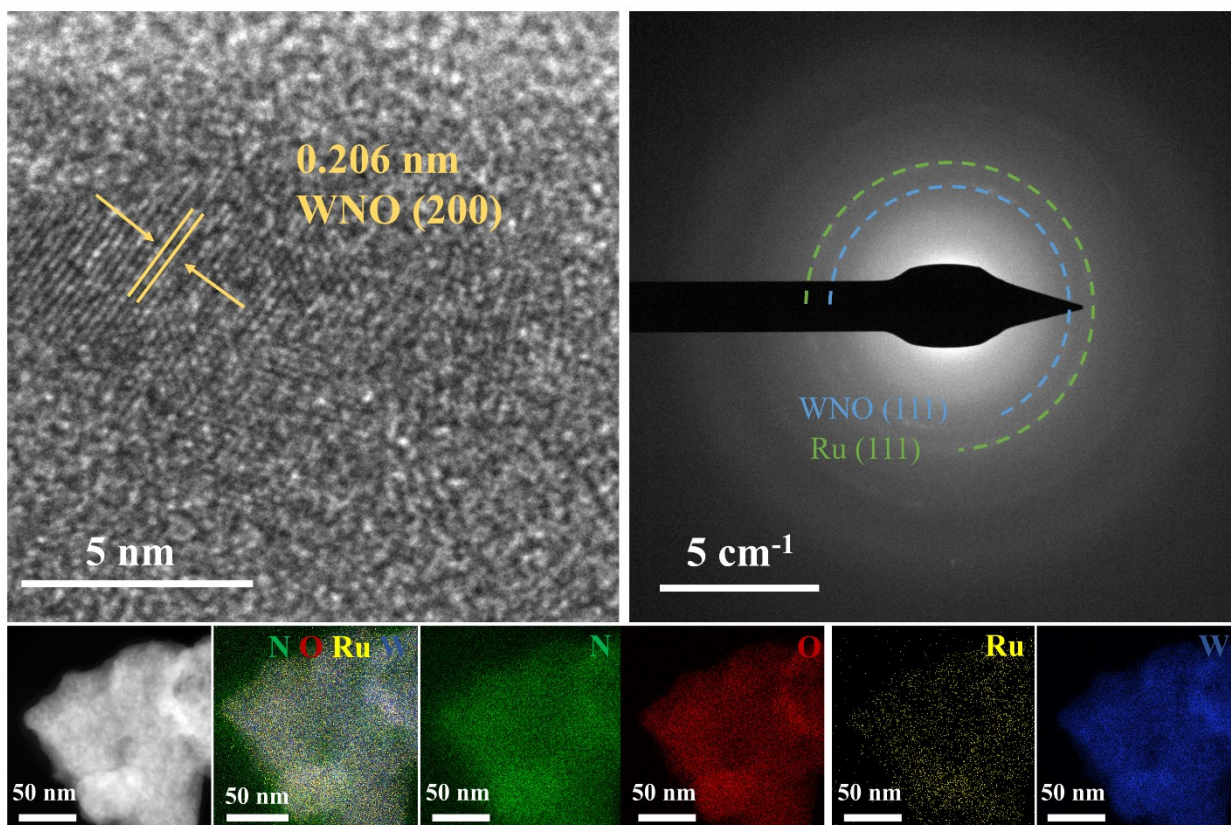

**Fig. S6.** TEM image, SAED pattern and elemental mapping images of Ru/WNO-600.



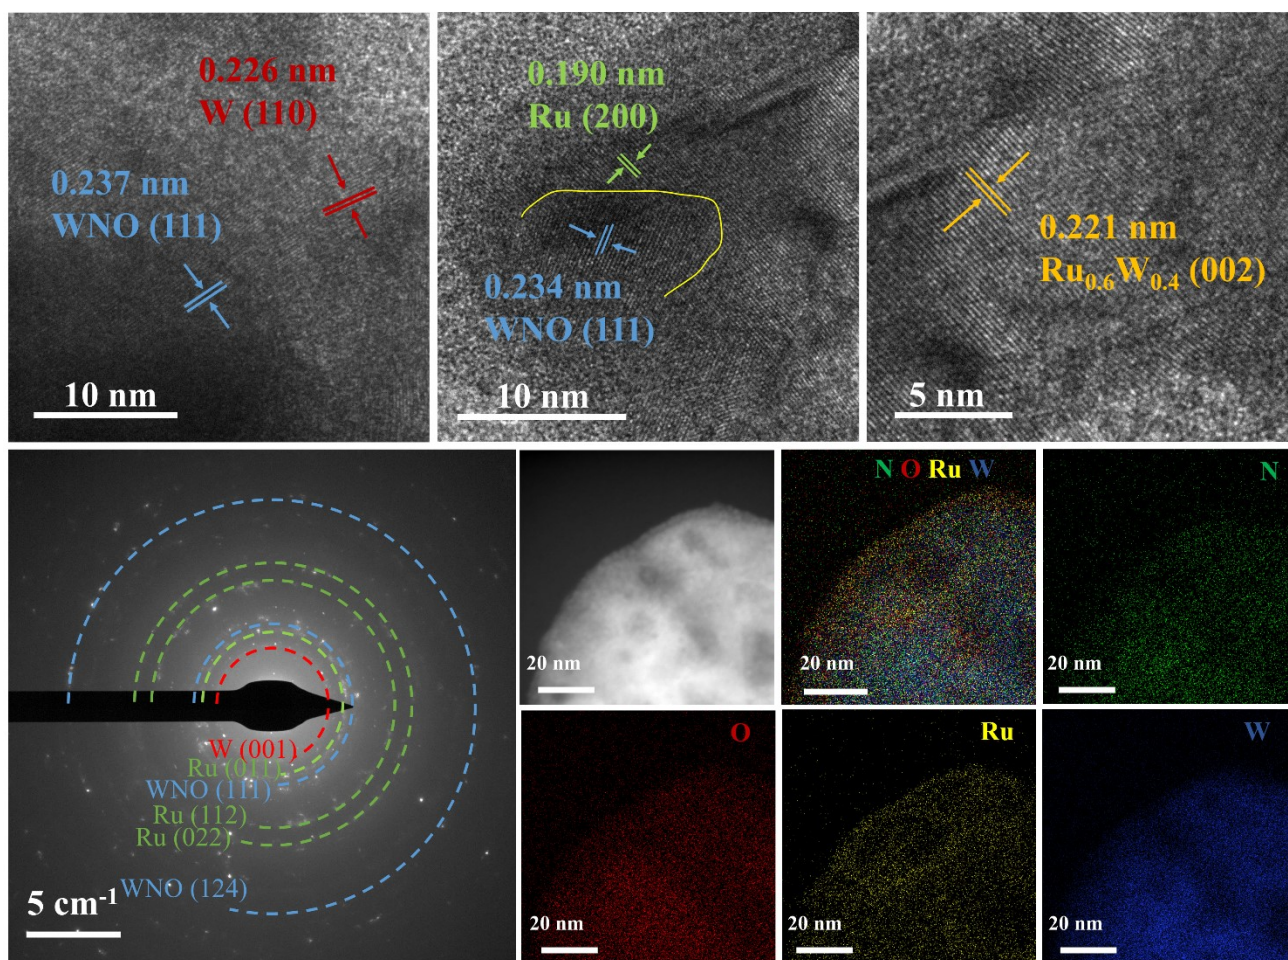

**Fig. S7.** TEM image, SAED pattern and elemental mapping images of Ru/WNO-900.

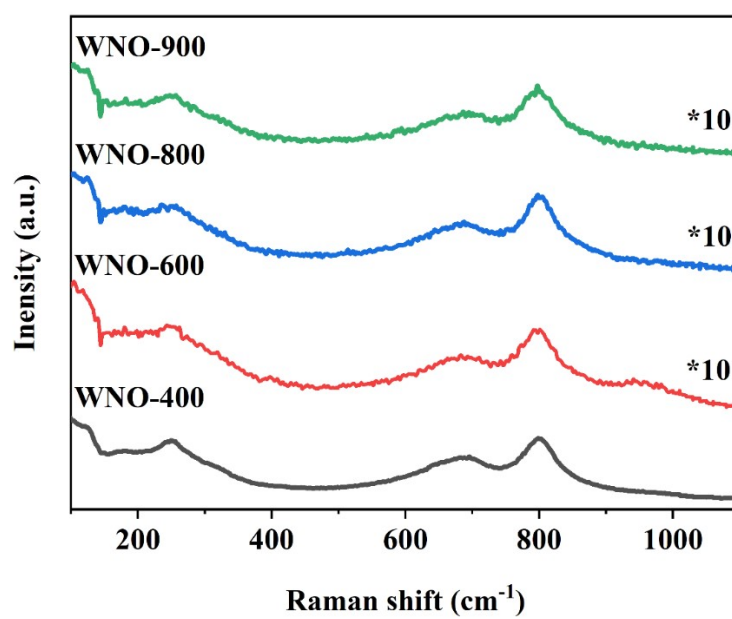

**Fig. S8.** Raman spectra of WNO-*t* catalysts.



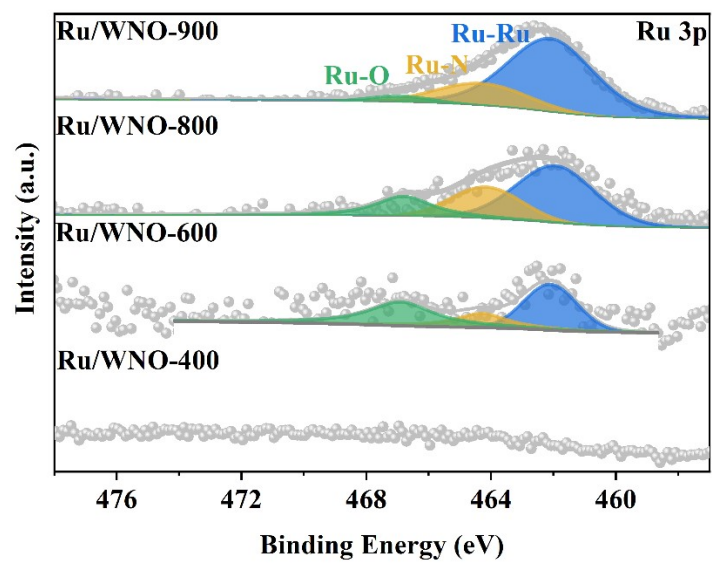

**Fig. S9.** Ru 3p spectra of Ru/WNO-*t* catalysts.

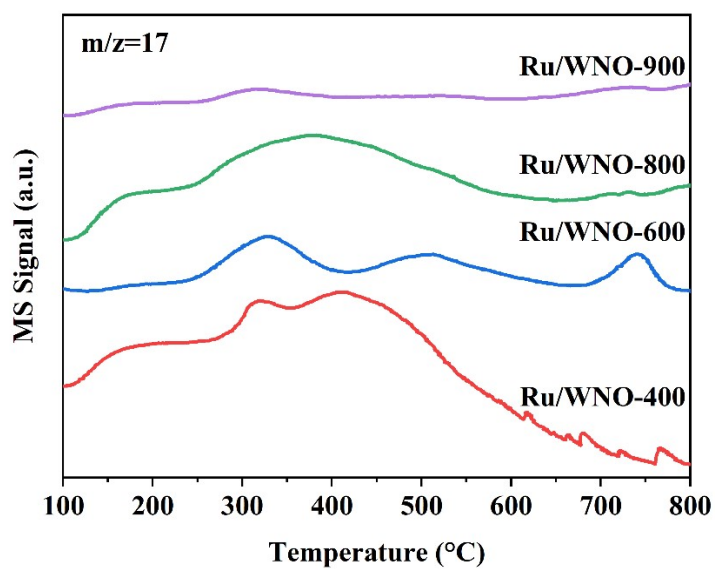

**Fig. S10.** NH<sub>3</sub>-TPD profiles of Ru/WNO-*t* catalysts.

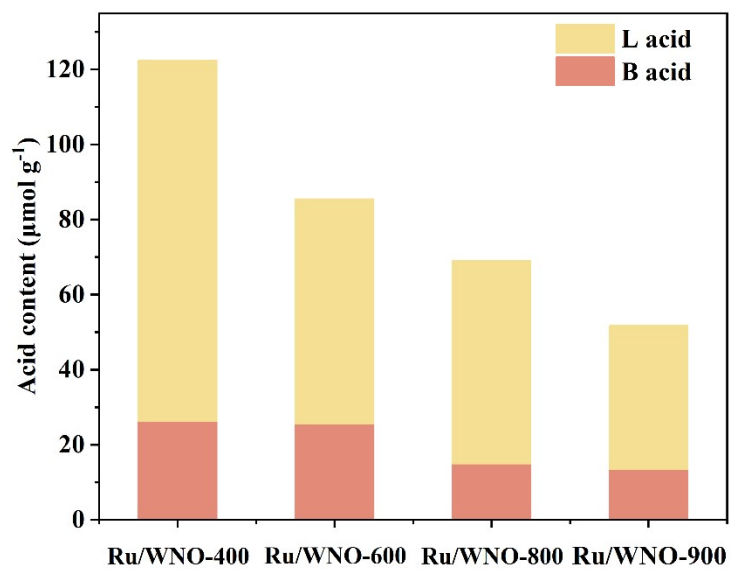

**Fig. S11.** Acidity content of Ru/WNO-*t* catalysts.

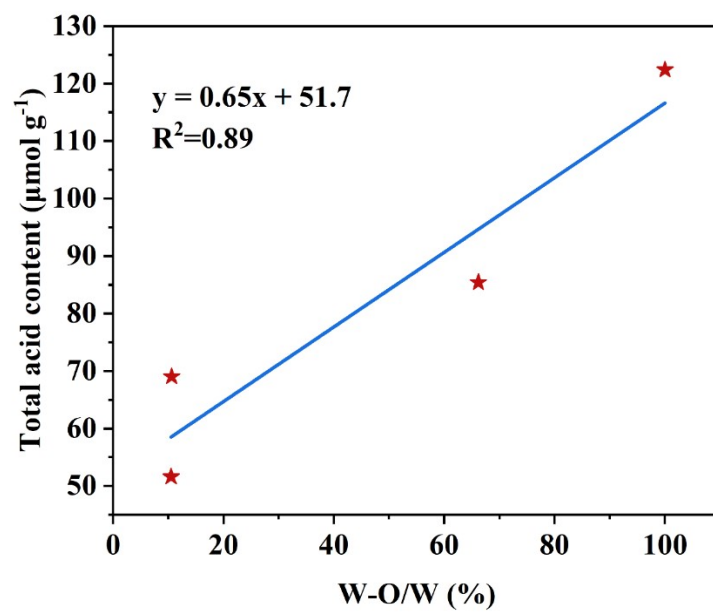

**Fig. S12.** The linear correlation between total acid amount and W-O bonds in Ru/WNO-*t* catalysts.

**Table S1.** Catalytic performance of Ru/WNO-*t*.

| Catalysis   | Conversion | Selectivity of products in liquid (%) |     |      |        |         |      |        | TOC  |
|-------------|------------|---------------------------------------|-----|------|--------|---------|------|--------|------|
|             |            | Sor                                   | Ery | EG   | 1,2-PG | 1,2-BDO | EtOH | Others |      |
| 3Ru/WNO-400 | >99        | 0.3                                   | 1.6 | 51.1 | 8.3    | 7.6     | 15.6 | 5.2    | 92.4 |
| 3Ru/WNO-600 | >99        | 0.3                                   | 1.2 | 55.9 | 9.7    | 10.0    | 12.8 | 4.5    | 94.4 |
| 3Ru/WNO-800 | >99        | 0.4                                   | 1.1 | 64.1 | 9.1    | 7.2     | 13.3 | 3.0    | 98.2 |
| 3Ru/WNO-900 | >99        | 3.5                                   | 3.2 | 57.2 | 8.6    | 6.4     | 10.5 | 4.6    | 94.0 |

Reaction condition: 0.1 g cellulose, 0.05 g catalysts, 245 °C, 5 MPa H<sub>2</sub>, 4 h. EG: ethylene glycol; EtOH: ethanol; 1,2-PG: 1,2-propylene glycol; 1,2-BDO: 1,2-butanediol; Sor: sorbitol; Ery: erythritol. Others: LA, Formic acid, acetic acid and other unidentified polyols and oligomers. TOC means total organic carbon in the liquid product.

**Table S2.** Catalytic performance of previously reported catalysts.

| Catalysts                                          | Temperature<br>/°C | Pressure<br>/MPa | Time<br>/h | EG<br>/% | EtOH<br>/% | References |
|----------------------------------------------------|--------------------|------------------|------------|----------|------------|------------|
| NiCu/WO <sub>3</sub>                               | 245                | 5.5              | 4          | 58.9     | 3.9        | 1          |
| Ru-WO <sub>x</sub> /SiO <sub>2</sub> (500 Å)       | 240                | 4                | 5          | 51.5     | 5.1        | 2          |
| Ir-WO <sub>x</sub> /SiO <sub>2</sub> (500 Å)       | 280                | 4                | 5          | 0.4      | 40.5       |            |
| Ni-Cu/4ZnO-CNT                                     | 255                | 4                | 6          | 24       | -          | 3          |
| NiW-[NC]-H <sub>2</sub>                            | 245                | 6                | 1          | 51       | -          | 4          |
| Ni@C/WO <sub>x</sub>                               | 250                | 5                | 2          | 69.4     | -          | 5          |
| Ru-WO <sub>x</sub> /TATP                           | 245                | 5                | 3          | 62.9     | -          | 6          |
| Pd/o-WO <sub>3</sub>                               | 245                | 5.5              | 4          | 64.8     | 15.4       | 7          |
| Ru-WO <sub>x</sub> /Nb <sub>2</sub> O <sub>5</sub> | 230                | 4                | 6          | 3.1      | 50.3       | 8          |
| Pt-WO <sub>x</sub> /Nb <sub>2</sub> O <sub>5</sub> |                    |                  |            | 52.6     | 25.9       |            |
| Pd/WO <sub>x</sub>                                 | 230                | 5                | 4          | 59.6     | 17.5       | 9          |

**Table S3.** Catalytic performance of Ru/WNO-800 under different reaction conditions.

| Reaction conditions     |                                     |             |                             | Conversion<br>(%) | Selectivity of products in liquid (%) |      |            |             |     |     |        | TO<br>C |
|-------------------------|-------------------------------------|-------------|-----------------------------|-------------------|---------------------------------------|------|------------|-------------|-----|-----|--------|---------|
| Temperatur<br>e<br>(°C) | H <sub>2</sub><br>Pressure<br>(MPa) | Time<br>(h) | Ratio<br>catalyst/cellulose |                   | EG                                    | EtOH | 1,2-<br>PG | 1,2-<br>BDO | Sor | Ery | Others |         |
| 215                     | 5                                   | 4           | 1:2                         | 71                | 30.0                                  | 7.6  | 5.6        | 6.4         | 1.5 | 3.2 | 6.6    | 60.9    |
| 230                     | 5                                   | 4           | 1:2                         | >99               | 50.9                                  | 9.6  | 6.9        | 7.7         | 1.7 | 3.2 | 5.6    | 85.6    |
| 245                     | 5                                   | 4           | 1:2                         | >99               | 64.1                                  | 13.3 | 9.1        | 7.2         | 0.4 | 1.1 | 3.0    | 98.2    |
| 260                     | 5                                   | 4           | 1:2                         | >99               | 56.4                                  | 13.2 | 8.3        | 5.8         | 0.1 | 0.9 | 5.0    | 89.7    |
| 245                     | 6                                   | 4           | 1:2                         | >99               | 57.7                                  | 11.4 | 5.0        | 8.1         | 0.7 | 2.4 | 1.0    | 86.3    |
| 245                     | 4                                   | 4           | 1:2                         | >99               | 52.6                                  | 10.5 | 7.2        | 7.3         | 0.6 | 1.4 | 1.2    | 80.8    |
| 245                     | 3                                   | 4           | 1:2                         | >99               | 48.4                                  | 10.4 | 4.7        | 5.8         | 0.3 | 1.3 | 0.5    | 71.4    |
| 245                     | 5                                   | 5           | 1:2                         | >99               | 53.7                                  | 13.7 | 5.2        | 8.1         | 0.2 | 1.7 | 0.8    | 83.4    |
| 245                     | 5                                   | 3           | 1:2                         | >99               | 57.4                                  | 9.4  | 12.3       | 6.6         | 3.0 | 3.3 | 0.5    | 92.5    |
| 245                     | 5                                   | 2           | 1:2                         | >99               | 40.2                                  | 10.9 | 8.1        | 8.9         | 2.5 | 2.4 | 0.7    | 73.7    |
| 245                     | 5                                   | 4           | 1:3                         | >99               | 52.9                                  | 10.0 | 7.0        | 6.4         | 1.3 | 1.7 | 4.3    | 83.6    |

EG: ethylene glycol; EtOH: ethanol; 1,2-PG: 1,2-propylene glycol; 1,2-BDO: 1,2-butanediol; Sor: sorbitol; Ery: erythritol. Others: LA, Formic acid, acetic acid and other unidentified polyols and oligomers. TOC means total organic carbon in the liquid product.

**Table S4.** The elemental content of Ru and W in the solution after reaction.

| Catalysts  | Ru (mg L <sup>-1</sup> ) | W (mg L <sup>-1</sup> ) |
|------------|--------------------------|-------------------------|
| Ru/WNO-800 | 0.22                     | 132.81                  |



**Table S5.** Structural parameters of Ru/WNO-*t* catalysts.

| Catalysts  | Surface Area<br>(m <sup>2</sup> g <sup>-1</sup> ) | Mecopore Volume<br>(10 <sup>-3</sup> cm <sup>3</sup> g <sup>-1</sup> ) | Average Pore Diameter<br>(nm) |
|------------|---------------------------------------------------|------------------------------------------------------------------------|-------------------------------|
| Ru/WNO-400 | 3.19                                              | 1.09                                                                   | 34.50                         |
| Ru/WNO-600 | 1.15                                              | 1.04                                                                   | 16.48                         |
| Ru/WNO-800 | 2.64                                              | 1.23                                                                   | 65.81                         |
| Ru/WNO-900 | 4.43                                              | 0.55                                                                   | 64.66                         |

**Table S6.** Relative acid amount of Ru/WNO-*t* catalysts obtained by NH<sub>3</sub>-TPD curves.

| Catalysts  | Relative acid amount × 10 <sup>3</sup> (a.u.) |
|------------|-----------------------------------------------|
| Ru/WNO-400 | 17.4                                          |
| Ru/WNO-600 | 9.1                                           |
| Ru/WNO-800 | 7.8                                           |
| Ru/WNO-900 | 2.8                                           |

**Table S7.** Different acid types of Ru/WNO-*t* catalysts obtained by Py-IR spectra.

| Catalysts  | B acid | L acid | Total acid |
|------------|--------|--------|------------|
| Ru/WNO-400 | 26.1   | 96.3   | 122.4      |
| Ru/WNO-600 | 25.4   | 60.0   | 85.4       |
| Ru/WNO-800 | 14.9   | 54.1   | 69.0       |
| Ru/WNO-900 | 13.5   | 38.2   | 51.6       |

## Reference

1. X. Yang, Z. Li, M. Guo, T. Zhao, X. Su, W. Jiang, G. Han and H. Ben, *Fuel*, 2023, **341**, 127560.
2. Y. Weng, Y. Wang, M. Zhang, X. Wang, Q. Sun, S. Mu, H. Wang, M. Fan and Y. Zhang, *Catalysis Today*, 2023, **407**, 89-95.
3. H. Ma, C. v. d. Wijst, S. F. Morken and D. Chen, *Catalysis Today*, 2024, **435**, 114694.
4. J. Boulos, F. Goc, N. Perret, F. Rataboul, J. Dhainaut and S. Royer, *ACS Applied Nano Materials*, 2024, **7**, 16086-16096.
5. M. Chen, Z. Yang, H. Xin, Y. Wang, D. Liang and C. Li, *ACS Sustainable Chemistry & Engineering*, 2025, **13**, 15201-15213.
6. Y. Zhao, Y. Ju, B. Guo, P. Gan, P. Lv, J. Yang, C. Qiao and K. Zhang, *RSC Advances*, 2025, **15**, 34754-34767.
7. W. Jia, W. Liu, Y. Cui, H. Song, C. Zhou, W. Jiang, H. Ben, X. Yang and D. Chen, *Journal of Catalysis*, 2025, **442**, 115860.
8. D. Wu, Y. Liu, X. Zhang, J. Liu, Q. Zhang, L. Ma and L. Chen, *Applied Catalysis A: General*, 2025, **699**, 120275.
9. W. Jia, H. Song, D. Wang, C. Zhou, Y. Zhao, Y. Cui, H. Ben and X. Yang, *ACS Sustainable Chemistry & Engineering*, 2025, **13**, 13274-13283.
